# Supplementary material for: MicroRNA 21a-5p overexpression impacts mediators of extracellular matrix formation in uterine leiomyoma
Source: PubMed Central journal article supplement (PMC5946472; doi:10.1186/s12958-018-0364-8), 2018-05-11
Supplement: 12958_2018_364_MOESM3_ESM.pdf [file 12958_2018_364_MOESM3_ESM.pdf]

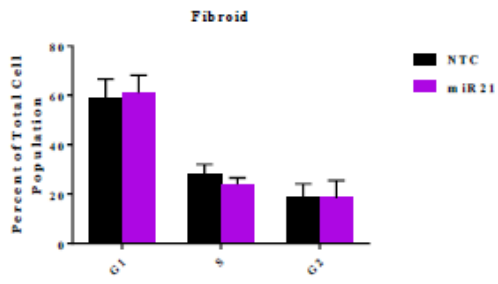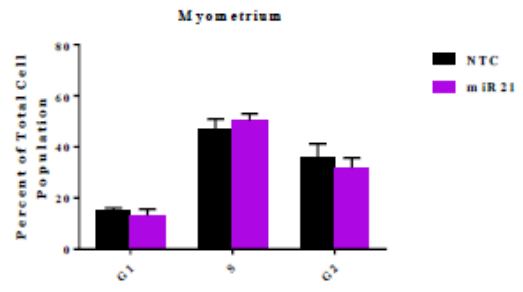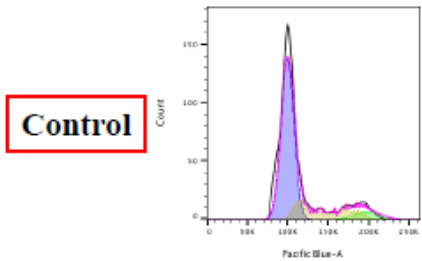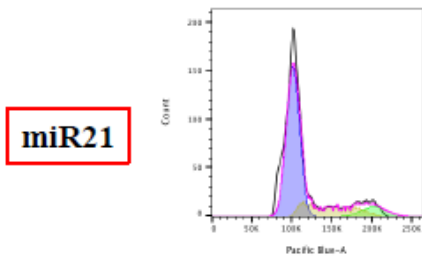

**Fibroid**

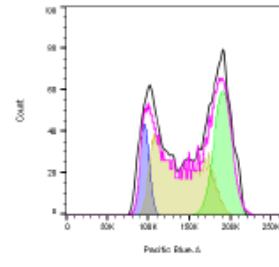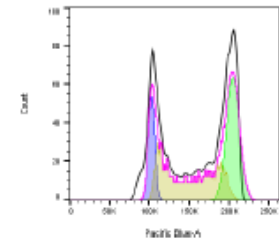

**Myometrium**
