# Supplementary material for: MicroRNA 21a-5p overexpression impacts mediators of extracellular matrix formation in uterine leiomyoma
Source: Springer Nature journal article supplement (doi:10.1186/s12958-018-0364-8), 2018-05-10

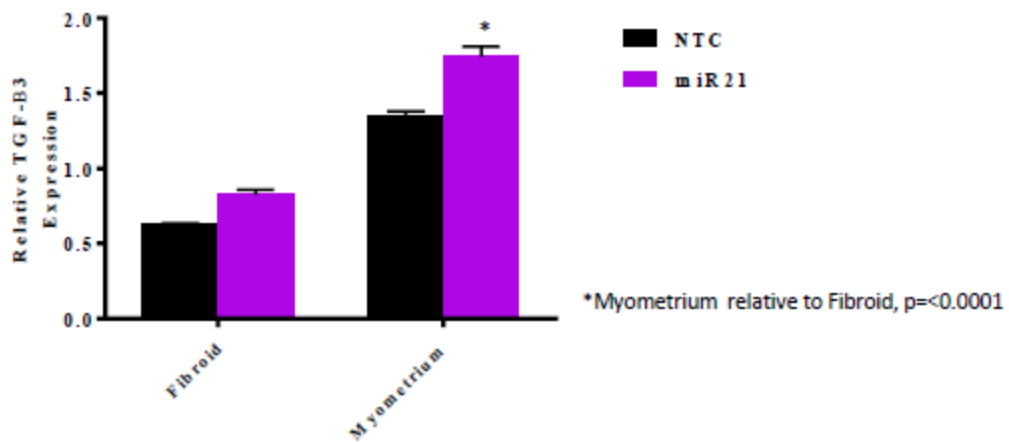

Supplement: MOESM1 [file 15757086]
